# Supplementary material for: Highly compliant and low strain hysteresis sensory electronic skins based on solution processable hybrid hydrogels
Source: Royal Society of Chemistry journal article supplement (doi:10.1039/d0tc05255h), 2020-12-23
Supplement: d0tc05255h1.pdf [file d0tc05255h1.pdf]

Supporting Information for

# Highly compliant and low strain hysteresis sensory electronic skins based on solution processable hybrid hydrogels

Mingcheng Wang,<sup>a</sup> Hongwei Zhou,<sup>\*,a</sup> Xilang Jin,<sup>a</sup> Hanbin Liu,<sup>b</sup> Aijie Ma,<sup>a</sup> Hanbing Yan,<sup>a</sup> Lin Chen,<sup>a</sup> Weixing Chen<sup>\*,a</sup>

<sup>a</sup>Shaanxi Key Laboratory of Photoelectric Functional Materials and Devices, School of Materials and Chemical Engineering, Xi'an Technological University, Xi'an, 710021, P. R. China.

<sup>b</sup>Shaanxi Provincial Key Laboratory of Papermaking Technology and Specialty Paper Development, College of Bioresource Chemical and Materials Engineering, Shaanxi University of Science & Technology, Xi'an 710021, P. R. China.

\*Corresponding author e-mail: [xatuzhou@163.com](mailto:xatuzhou@163.com), [chenwx@xatu.edu.cn](mailto:chenwx@xatu.edu.cn)

## 1 Mechanical properties and chemical compositions of PVA/PANI hydrogels

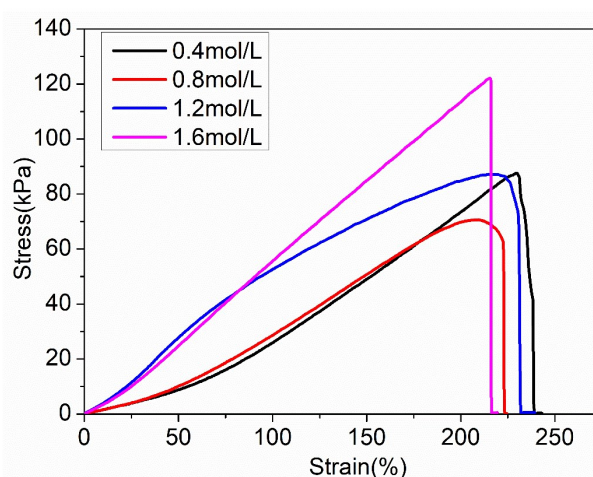

Figure S1. The mechanical properties of hydrogels prepared with different aniline concentrations.

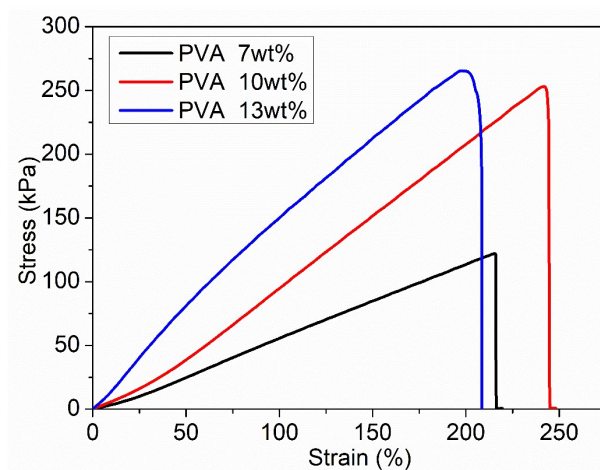

Figure S2. The mechanical properties of hydrogels with different PVA contents.

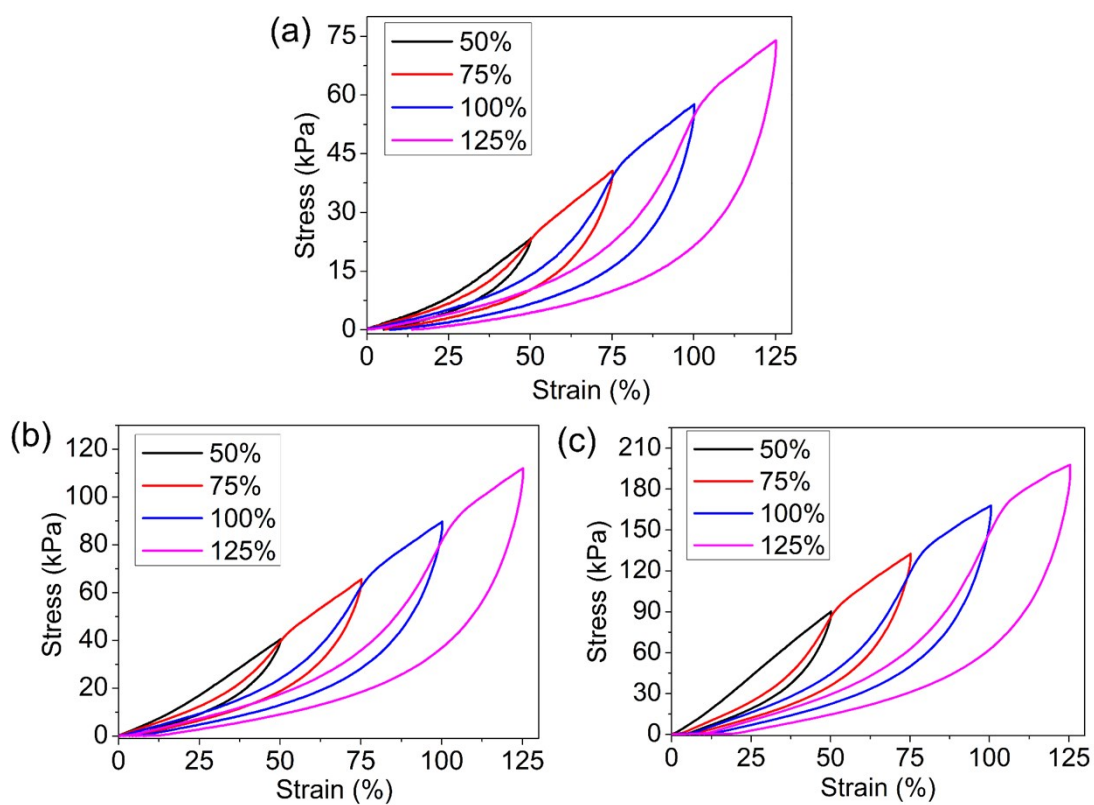

Figure S3. Tensile loading-unloading curves of PVA/PANI hydrogels. Aniline concentrations: 1.6 mol/L. (a) PVA: 7 wt%, (b) PVA: 10 wt%, (c) PVA: 13 wt%.

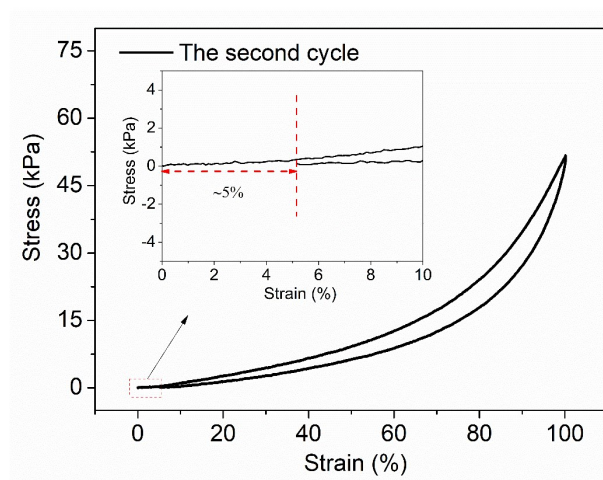

Figure S4. The second cyclic loading-unloading curves at a strain of 100%. (PVA: 7 wt%, Aniline concentrations: 1.6 mol/L).

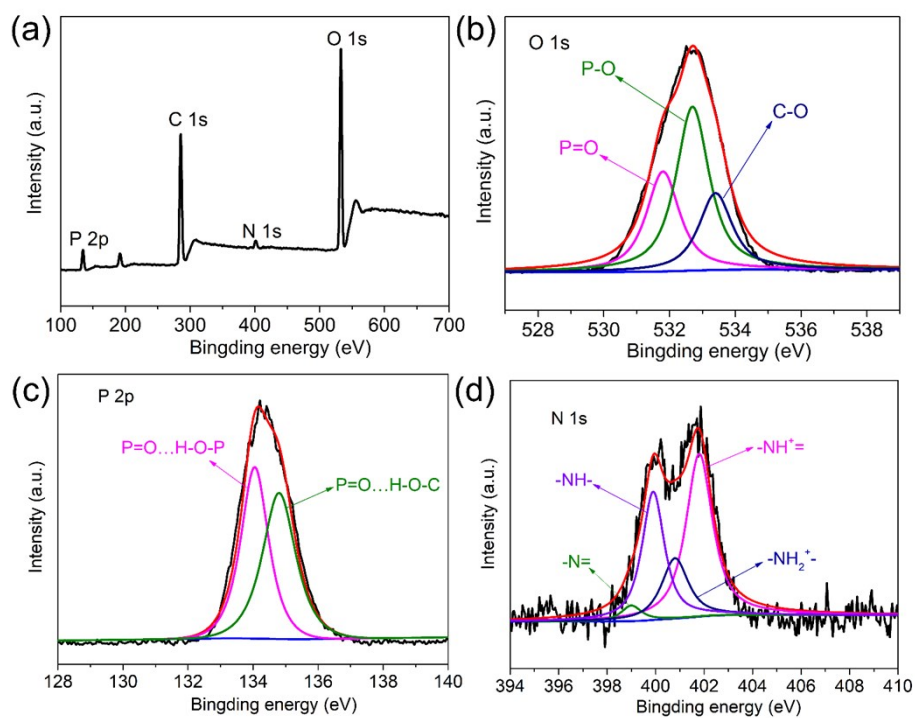

Figure S5. XPS spectra of PVA/PANI hydrogel. (a) Full score, (b), (c), (d) are the high-resolution O 1s, P 2p, and N 1s spectra respectively.

## 2 Conductivity of PVA/PANI hydrogels

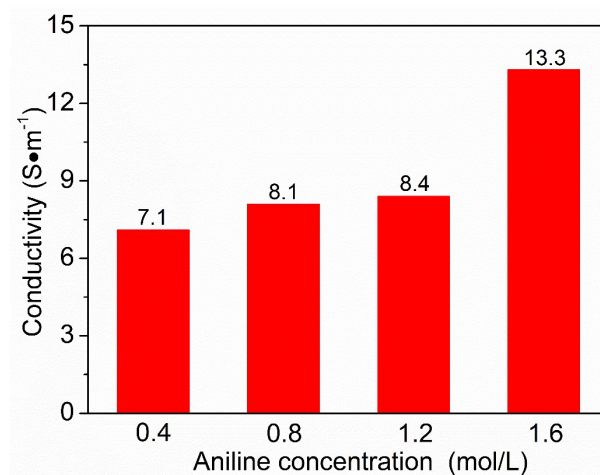

Figure S6. The conductivity of hydrogels prepared with different aniline concentrations. (PVA: 7 wt%)

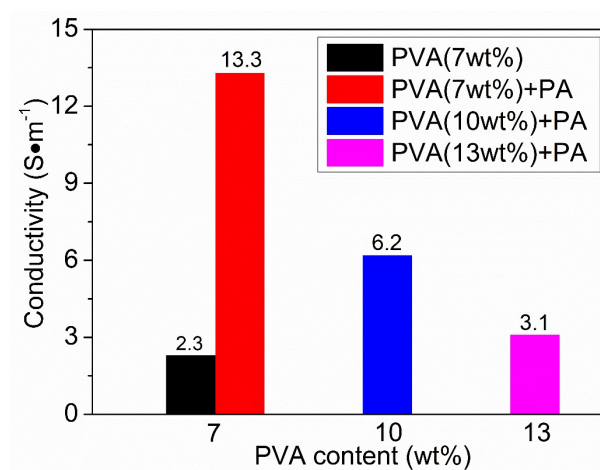

Figure S7. The conductivity of hydrogels with different PVA contents. (Aniline concentrations: 1.6 mol/L)

### 3 Conductivity of regenerated hydrogels

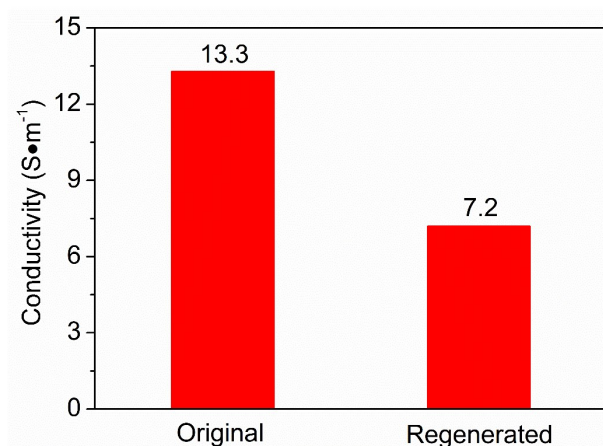

Figure S8. The conductivity of original hydrogel and regenerated hydrogel. (PVA: 7 wt%, Aniline concentrations: 1.6 mol/L)

### 4 Thermogravimetric analysis and mechanical properties of organohydrogels

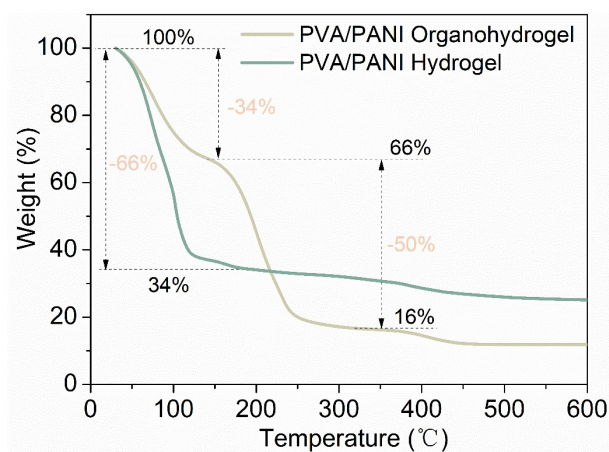

Figure S9. Thermogravimetric analysis of organohydrogels and hydrogels.

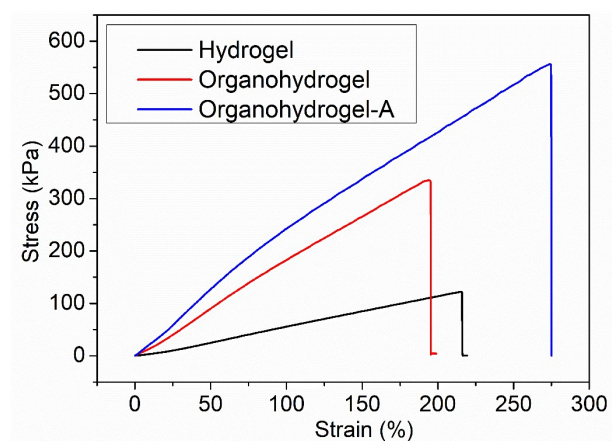

Figure S10. Typical stress-strain curves of typical PVA/PANI hydrogels, organohydrogel and organohydrogel-A. (PVA: 7 wt%, Aniline concentrations: 1.6 mol/L)
